# Supplementary material for: Direct RNA nanopore sequencing of full-length coronavirus genomes provides novel insights into structural variants and enables modification analysis
Source: PubMed Central journal article supplement — Genome Res. 2019 Sep;29(9):1545–54. doi: 10.1101/gr.247064.118 (PMC6724671; doi:10.1101/gr.247064.118), 2019-09
Supplement: supp_gr.247064.118_Supplemental_Fig_S2.pdf [file supp_gr.247064.118_Supplemental_Fig_S2.pdf]

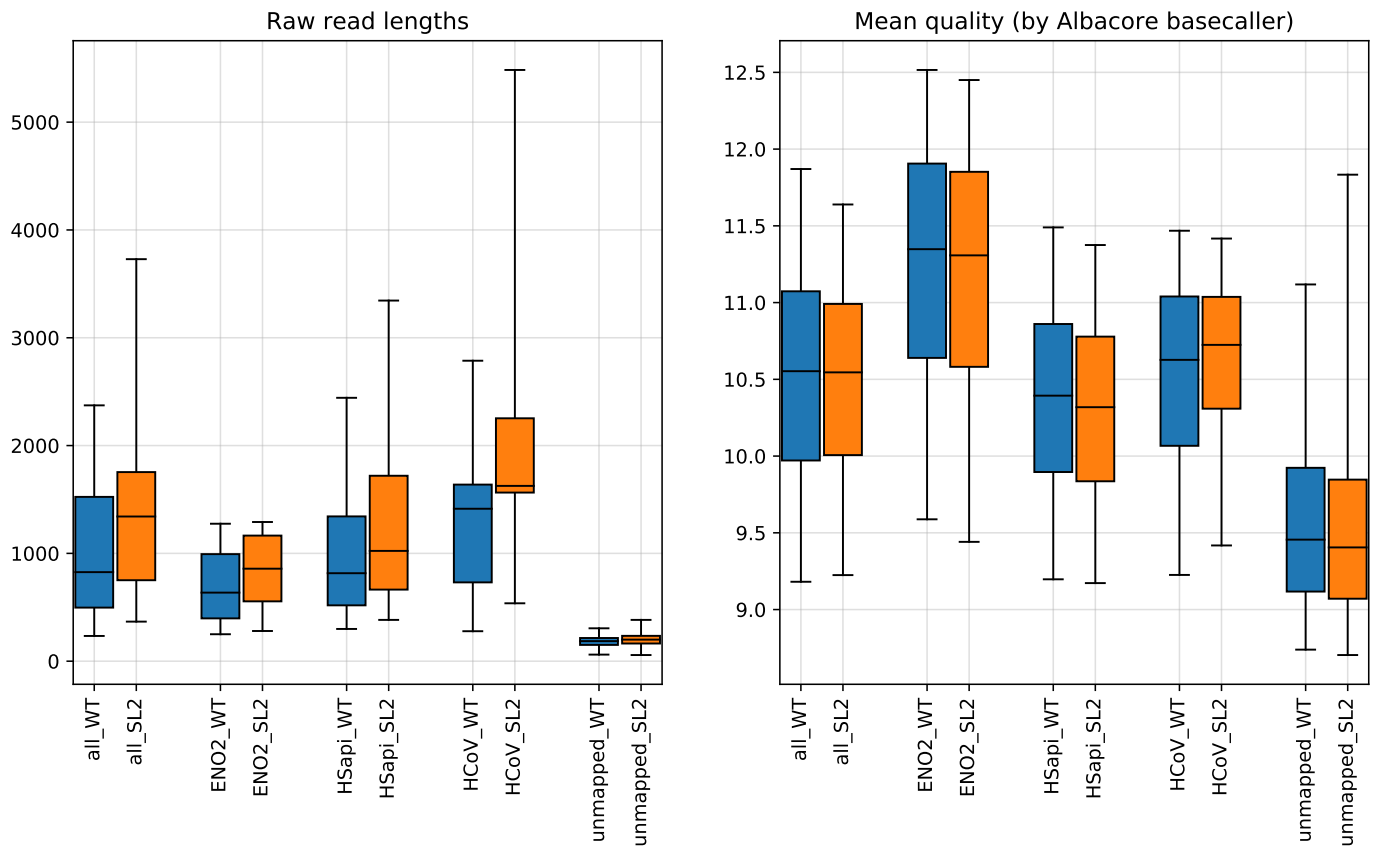

**Supplemental Figure 1** Box plots for raw properties of different read groups (mapping target categories based on minimap2 alignments). Boxes show quartiles, whiskers show 5/95 percentiles. Note that extreme values are omitted for visibility reasons (the very long reads covering the full virus genome would dominate the y-axis). **Left:** Raw read lengths per category. Reads that were not aligned by minimap ('unmapped') are mostly very short (median length <200). **Right:** Mean read quality by category. Reads in the 'unmapped' group display reduced quality. Note that the quality score given to each base by the Albacore basecaller is not a Phred quality score for sequencing, but rather represents a confidence score of that particular basecall. Also note that reads aligned to the yeast enolase 2 mRNA show elevated average quality, which is expected because the Albacore basecaller was trained on this calibration strand. Due to the outlined quality concerns for reads in the 'unmapped' category, and because these represented only 0.30% and 0.07% of total bases respectively, we chose to only use the higher quality reads that minimap2 could align.
