# Supplementary material for: Direct RNA nanopore sequencing of full-length coronavirus genomes provides novel insights into structural variants and enables modification analysis
Source: PubMed Central journal article supplement — Genome Res. 2019 Sep;29(9):1545–54. doi: 10.1101/gr.247064.118 (PMC6724671; doi:10.1101/gr.247064.118), 2019-09
Supplement: supp_gr.247064.118_Supplemental_Fig_S3.pdf [file supp_gr.247064.118_Supplemental_Fig_S3.pdf]

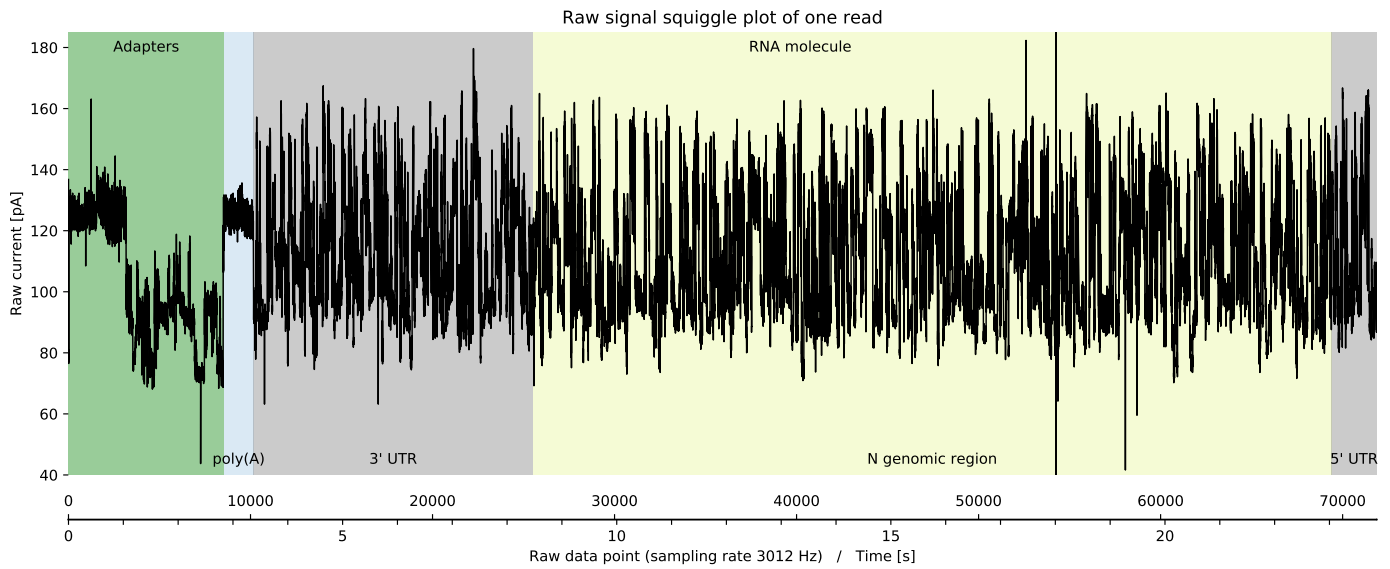

**Supplemental Figure 1** Raw signal 'squiggle' plot of one example read from the WT sample. Of note, sequencing starts from the 3'-polyadenylated end of the mRNA. The MinION measures the current inside the nanopore with a fixed sampling rate while a molecule passes through. Basecalling algorithms work directly on this raw signal data to infer the nucleotide sequence (Garalde *et al.* 2018). Unlike all other current sequencing technologies, nanopore sequencing conserves the information about base modifications in the raw signal (Garalde *et al.* 2018). SFig. 2 exemplarily shows a 5mC methylation pattern detected on raw signal data.

## References

Garalde, D. R., E. A. Snell, D. Jachimowicz, B. Sipos, J. H. Lloyd, *et al.*, 2018 Highly parallel direct RNA sequencing on an array of nanopores. *Nat Methods* 15: 201–206.
