# Supplementary material for: Direct RNA nanopore sequencing of full-length coronavirus genomes provides novel insights into structural variants and enables modification analysis
Source: PubMed Central journal article supplement — Genome Res. 2019 Sep;29(9):1545–54. doi: 10.1101/gr.247064.118 (PMC6724671; doi:10.1101/gr.247064.118), 2019-09
Supplement: supp_gr.247064.118_Supplemental_Fig_S4.pdf [file supp_gr.247064.118_Supplemental_Fig_S4.pdf]

Statistics for deletions of size 1

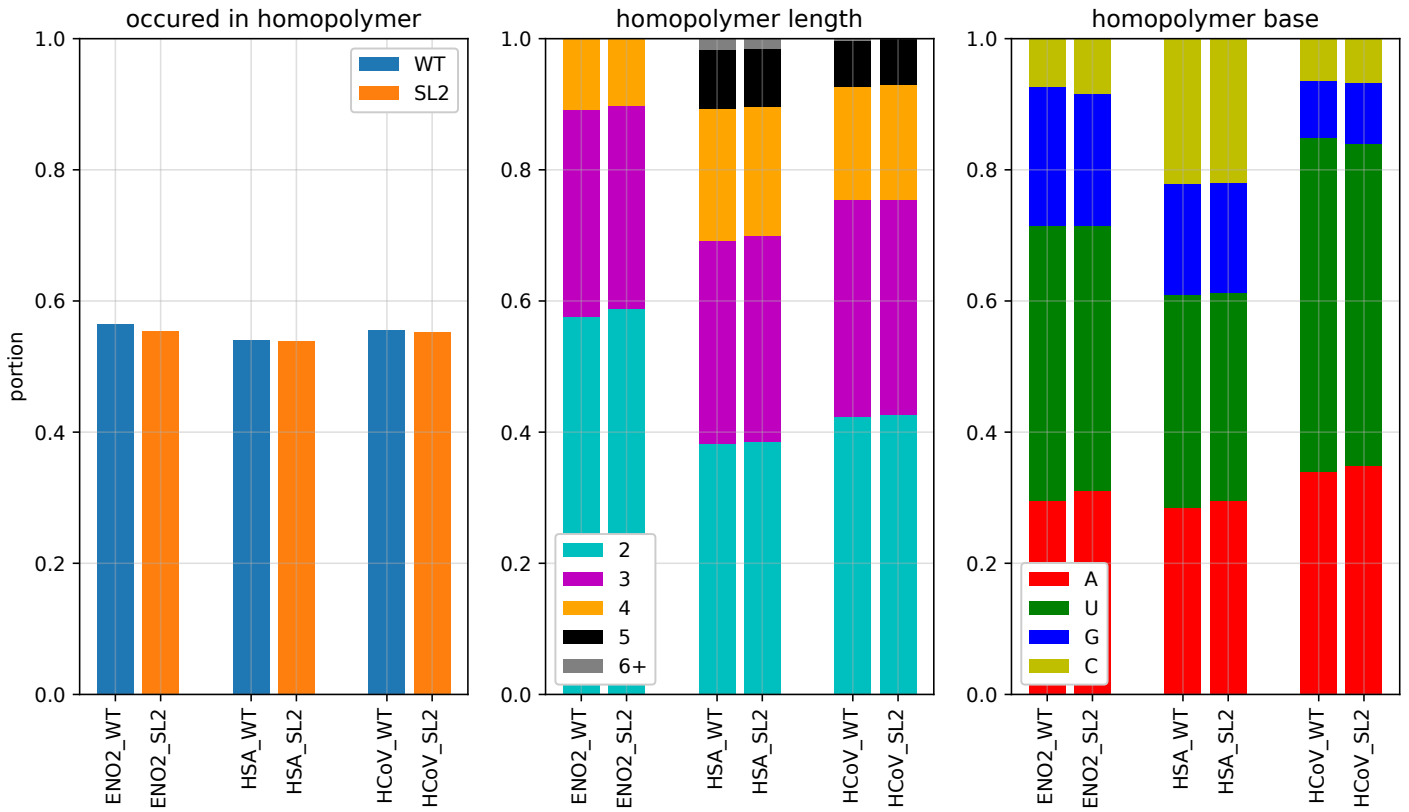

**Supplemental Figure 1** Statistics for all deletions of size 1 in all mappings against the yeast enolase 2, human and HCoV. **Left:** More than 53% of all size 1 deletions occurred in homopolymers (minimum stretch length of 2). **Middle:** A large proportion of the homopolymer stretches that coincide with a deletion are longer than 2 nucleotides. **Right:** A/U stretches appear more prone to causing deletion errors during basecalling, even with consideration of the G/C content of HCoV at 38.3%.
