# Supplementary material for: Direct RNA nanopore sequencing of full-length coronavirus genomes provides novel insights into structural variants and enables modification analysis
Source: PubMed Central journal article supplement — Genome Res. 2019 Sep;29(9):1545–54. doi: 10.1101/gr.247064.118 (PMC6724671; doi:10.1101/gr.247064.118), 2019-09
Supplement: supp_gr.247064.118_Supplemental_Fig_S7.pdf [file supp_gr.247064.118_Supplemental_Fig_S7.pdf]

## WT Sample

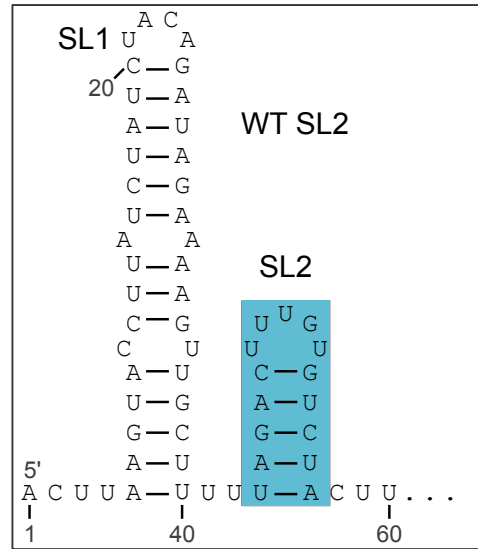

Loop exchange

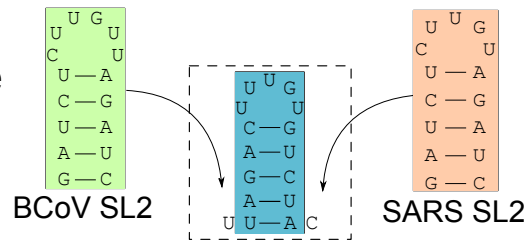

## Pooled SL2 Sample

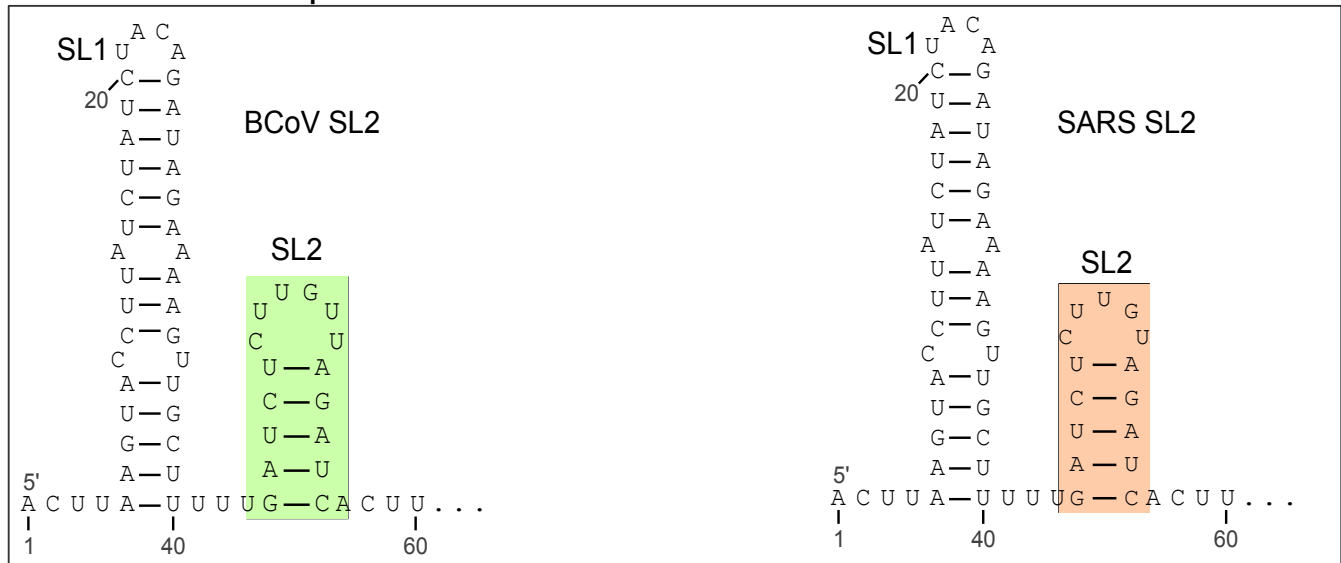

**Supplemental Figure 1 Upper:** The first 60 nucleotides of the 5'-UTR of the HCoV-229E are shown with their predicted RNA secondary structure using RNAfold (Lorenz *et al.* 2011). **Middle:** The SL2 region of the wild type (blue box) was exchanged with the BCoV (green box) and SARS-CoV (orange box) counterpart, respectively (Madhugiri *et al.* 2018). **Lower:** The resulting structure after changing the SL2 region.

## References

- Lorenz, R., S. H. Bernhart, C. Höner Zu Siederdisen, H. Tafer, C. Flamm, *et al.*, 2011 ViennaRNA package 2.0. Algorithms Mol Biol 6: 26.
- Madhugiri, R., N. Karl, D. Petersen, K. Lamkiewicz, M. Fricke, *et al.*, 2018 Structural and functional conservation of cis-acting RNA elements in coronavirus 5'-terminal genome regions. Virology 517: 44–55.
