# Supplementary material for: Direct RNA nanopore sequencing of full-length coronavirus genomes provides novel insights into structural variants and enables modification analysis
Source: PubMed Central journal article supplement — Genome Res. 2019 Sep;29(9):1545–54. doi: 10.1101/gr.247064.118 (PMC6724671; doi:10.1101/gr.247064.118), 2019-09
Supplement: supp_gr.247064.118_Supplemental_Fig_S9.pdf [file supp_gr.247064.118_Supplemental_Fig_S9.pdf]

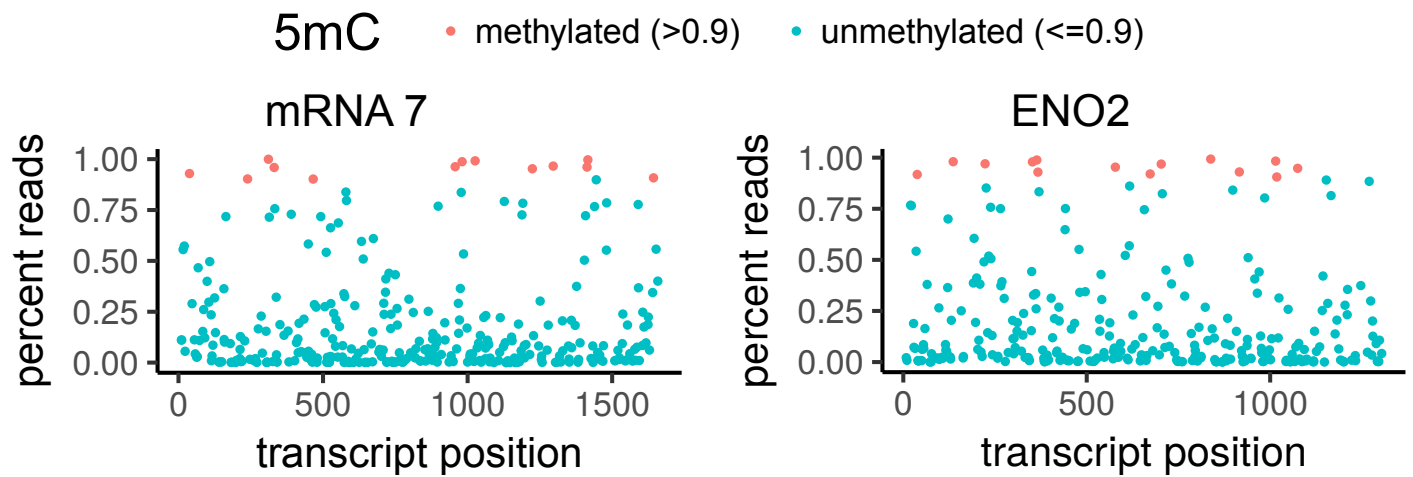

**Supplemental Figure 1** Tombo results for mRNA 7 and yeast ENO2. **Left:** Several cytosine positions were called as 5mC methylated in more than 90 % of covering reads. **Right:** The unmodified negative control – an *in vitro* yeast enolase II transcript – presented several positions that were assigned a methylated state by Tombo. We used this control to obtain a threshold for the minimum percentage of reads in the methylated state, so as to obtain a FPR of 5%. As discussed in the manuscript, this threshold is 90 % of reads. While the overall methylation pattern looks similar, we nevertheless find consistent methylation across different subgenomic RNA "types", i.e. methylated positions of mRNA 2 are mirrored in mRNA 4 etc (see Fig. 6).
