# Supplementary material for: Direct RNA nanopore sequencing of full-length coronavirus genomes provides novel insights into structural variants and enables modification analysis
Source: HighWire-hosted journal article supplement (doi:10.1101/gr.247064.118), 2019-08-22

# Statistics for deletions of size 1

## occured in homopolymer

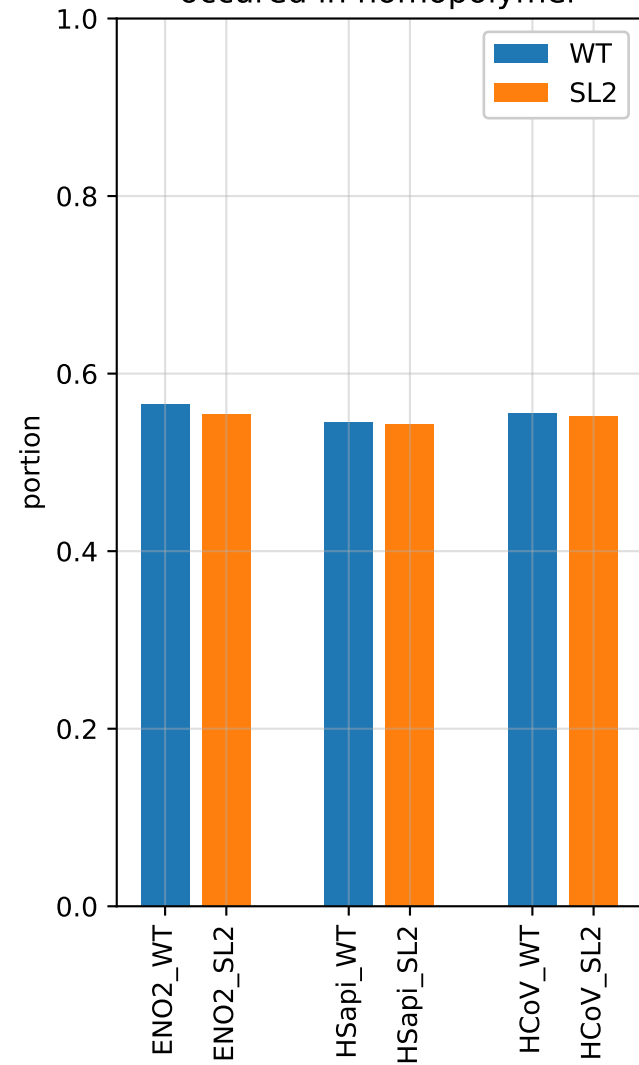

## homopolymer length

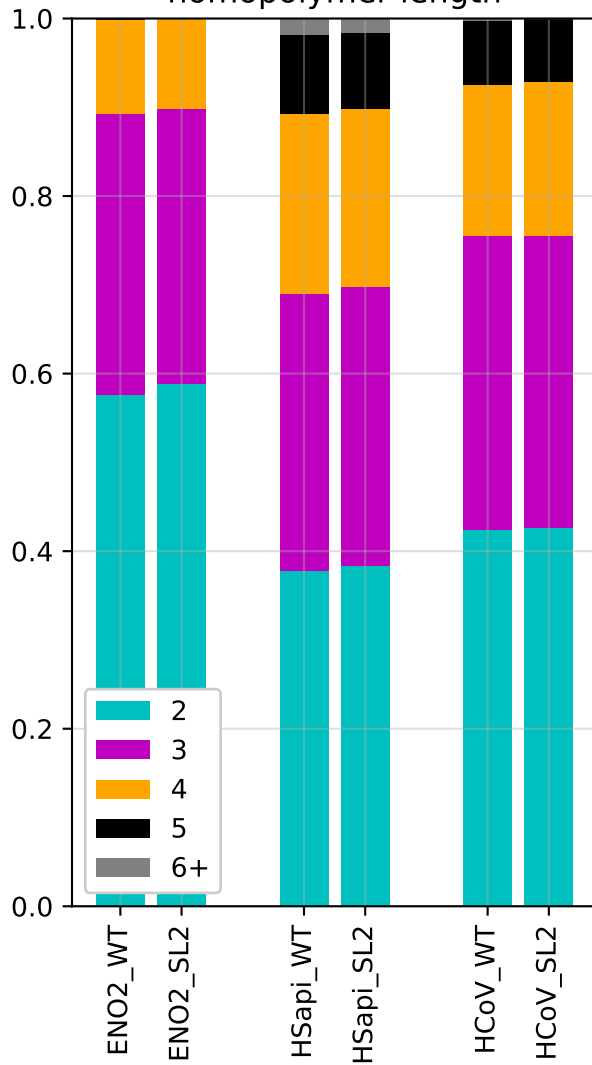

## homopolymer base

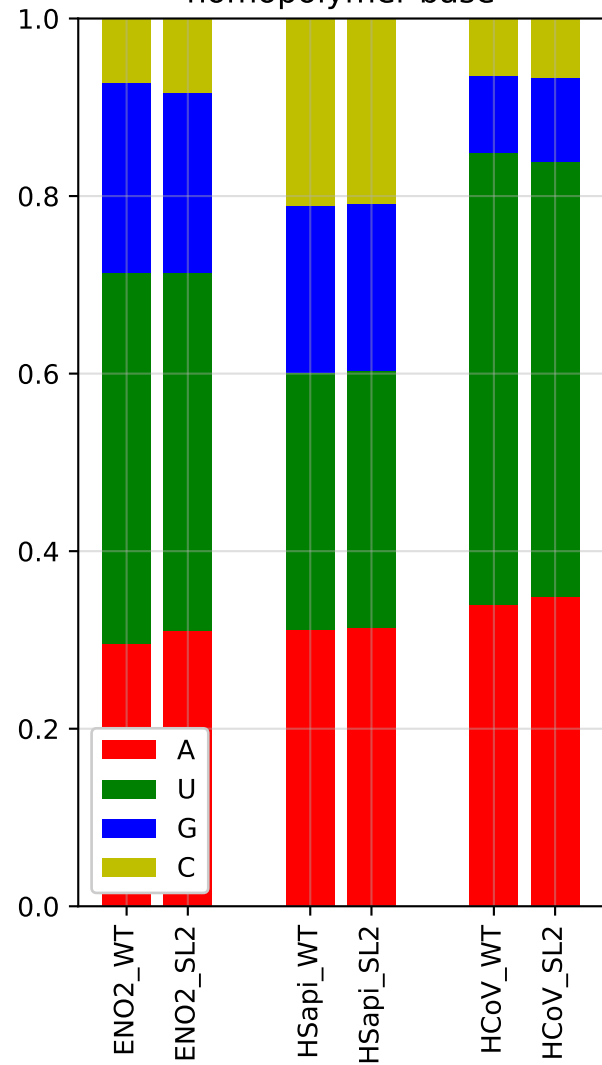

Supplement: Supplemental_Code.zip [file deletions_homopolymer.pdf › analysis_code/homopolymer/deletions_homopolymer.pdf]
