# Supplementary figures and images for: Direct RNA nanopore sequencing of full-length coronavirus genomes provides novel insights into structural variants and enables modification analysis
Source: HighWire-hosted journal article supplement (doi:10.1101/gr.247064.118), 2019-08-22

Raw read lengths

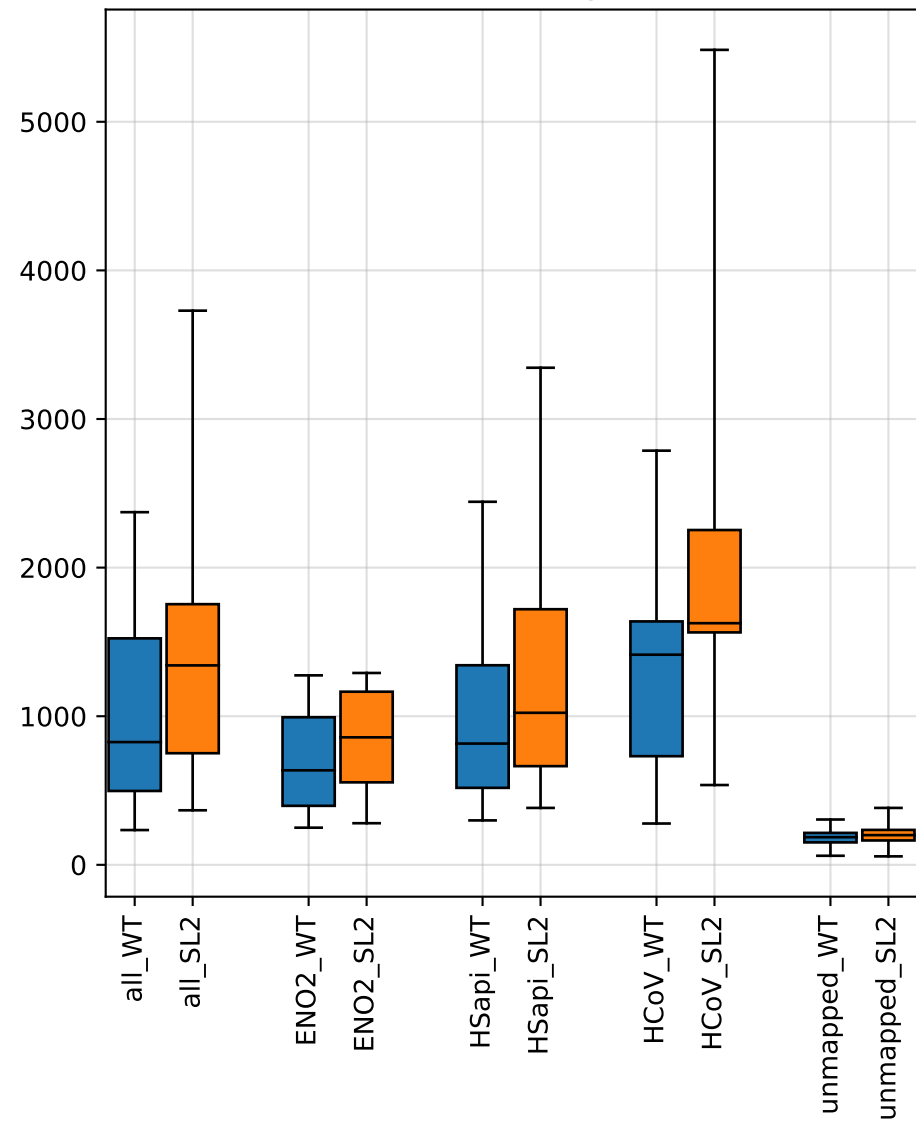

Mean quality (by Albacore basecaller)

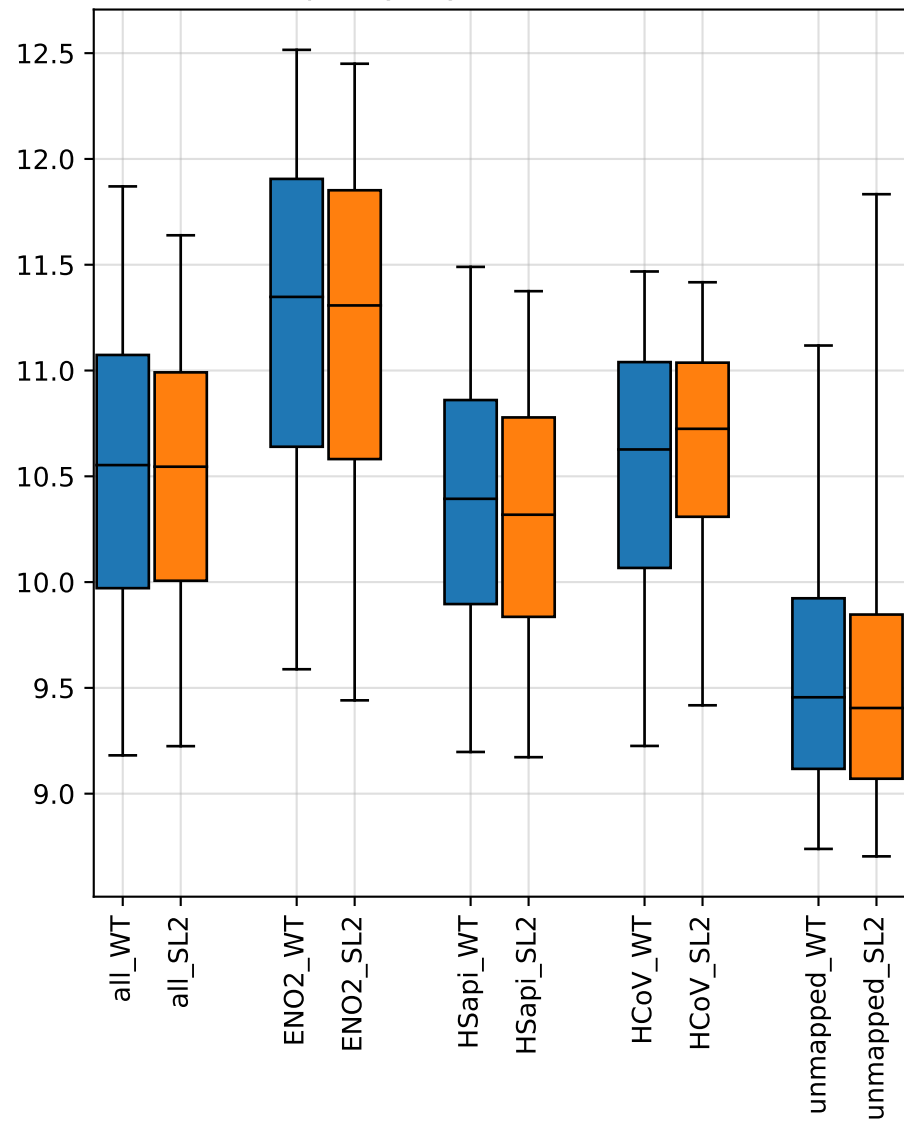

Supplement: Supplemental_Code.zip [file restplot.pdf › analysis_code/origin/restplot/restplot.pdf]
